# Supplementary material for: Imidazole-assisted film-based fluorescent sensor for the ultrasensitive detection of hydrazine
Source: Royal Society of Chemistry journal article supplement (doi:10.1039/d4tc00567h), 2024-01-01
Supplement: d4tc00567h1.pdf [file d4tc00567h1.pdf]

## Electronic Supplementary Information

### Imidazole assisted film-based fluorescent sensor for ultrasensitive detection of hydrazine

*Mohammad Masood Zafar,<sup>a</sup> Subash Ch. Sahoo,<sup>b</sup> Vakayil K. Praveen,<sup>c,d</sup> Nidhi Tyagi,<sup>\*e</sup> and Rakesh K. Mishra<sup>\*a</sup>*

---

<sup>a</sup>Department of Chemistry, National Institute of Technology Uttarakhand (NITUK), Srinagar (Garhwal)-246174, Uttarakhand, India; <sup>b</sup>Department of Chemistry, Panjab University, Chandigarh-160014, India; <sup>c</sup>Chemical Sciences and Technology Division, CSIR-National Institute for Interdisciplinary Science and Technology (CSIR-NIIST), Thiruvananthapuram – 695019, Kerala, India; <sup>d</sup>Academy of Scientific and Innovative Research (AcSIR), Ghaziabad 201002, India; <sup>e</sup>School of Chemical Sciences, Amity University Punjab, Sector 82A, IT City, International Airport Road, Mohali-140306, Punjab, India.

## TABLE OF CONTENTS

| Sl. No. | Experimental Details                                                                                                                   | Page No |
|---------|----------------------------------------------------------------------------------------------------------------------------------------|---------|
| 1       | FT-IR, <sup>1</sup> H NMR, <sup>13</sup> C NMR, and HRMS spectra of compounds <b>1</b> , <b>R-1</b> and <b>R-2</b> (Fig. S1-S10) ..... | S3-S7   |
| 2       | Crystallographic data .....                                                                                                            | S8      |
| 2.1     | <b>Table S1:</b> Selected crystallographic data of <b>R-1</b> and <b>R-2</b> .....                                                     | S8      |
| 2.2     | <b>Table S2:</b> Selected parameters for weak interactions in <b>R-1</b> and <b>R-2</b> .....                                          | S8      |
| 3       | Theoretical Data .....                                                                                                                 | S9      |
| 3.1     | <b>Table S3:</b> Comparison of absorption properties of <b>R-1</b> , <b>R-1-N<sub>2</sub>H<sub>4</sub></b> and <b>R-2</b> .....        | S9      |
| 3.2     | <b>Table S4:</b> Comparison of emission properties of <b>R-1</b> , <b>R-1-N<sub>2</sub>H<sub>4</sub></b> and <b>R-2</b> .....          | S9      |
| 4       | Aggregation studies of compounds <b>R-1</b> and <b>R-2</b> (Fig. S11) .....                                                            | S10     |
| 4.1     | Viscosity experiments and lifetime studies (Fig. S12) .....                                                                            | S10-11  |
| 4.2     | Scheme showing the mechanism of the enhanced emission of <b>R-1</b> and <b>R-2</b> (Scheme S1) .....                                   | S11     |
| 5       | Fluorescence titration studies of <b>R-2</b> (Fig. S13) .....                                                                          | S12     |
| 6       | <b>Table S5:</b> Comparison data of previously reported N <sub>2</sub> H <sub>4</sub> sensors with current data .....                  | S12-S14 |
| 7       | Sensitivity of <b>R-1</b> (50 μM, DMSO) towards hydrazine vapour (Fig. S14) .....                                                      | S15     |
| 8       | HRMS spectrum of <b>R-1-N<sub>2</sub>H<sub>4</sub></b> product (Fig. S15) .....                                                        | S15     |
| 9       | Optimized structure of <b>R-1-N<sub>2</sub>H<sub>4</sub></b> product and HOMO, LUMO (Fig. S16) .....                                   | S16     |
| 10      | Solid-state sensing studies of N <sub>2</sub> H <sub>4</sub> (Fig. S17) .....                                                          | S16     |
| 11      | Temperature-dependant <sup>1</sup> H NMR studies of <b>R-1</b> (Fig. S18) .....                                                        | S17     |
| 12      | Cytotoxicity of <b>R-1</b> (Fig. S19) .....                                                                                            | S17     |
| 13      | Supplementary information references .....                                                                                             | S18     |

# 1. FT-IR, <sup>1</sup>H NMR, <sup>13</sup>C NMR, and HRMS spectra of the compounds 1, R-1 and R-2

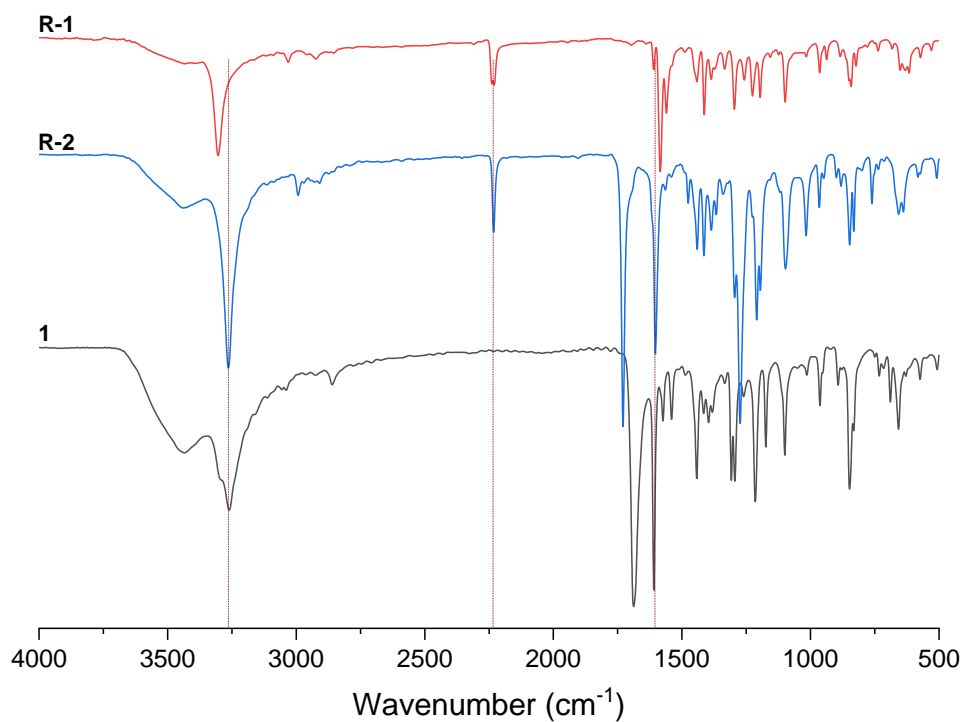

Fig. S1 Overlay FT-IR spectra of the compounds 1, R-1 and R-2.

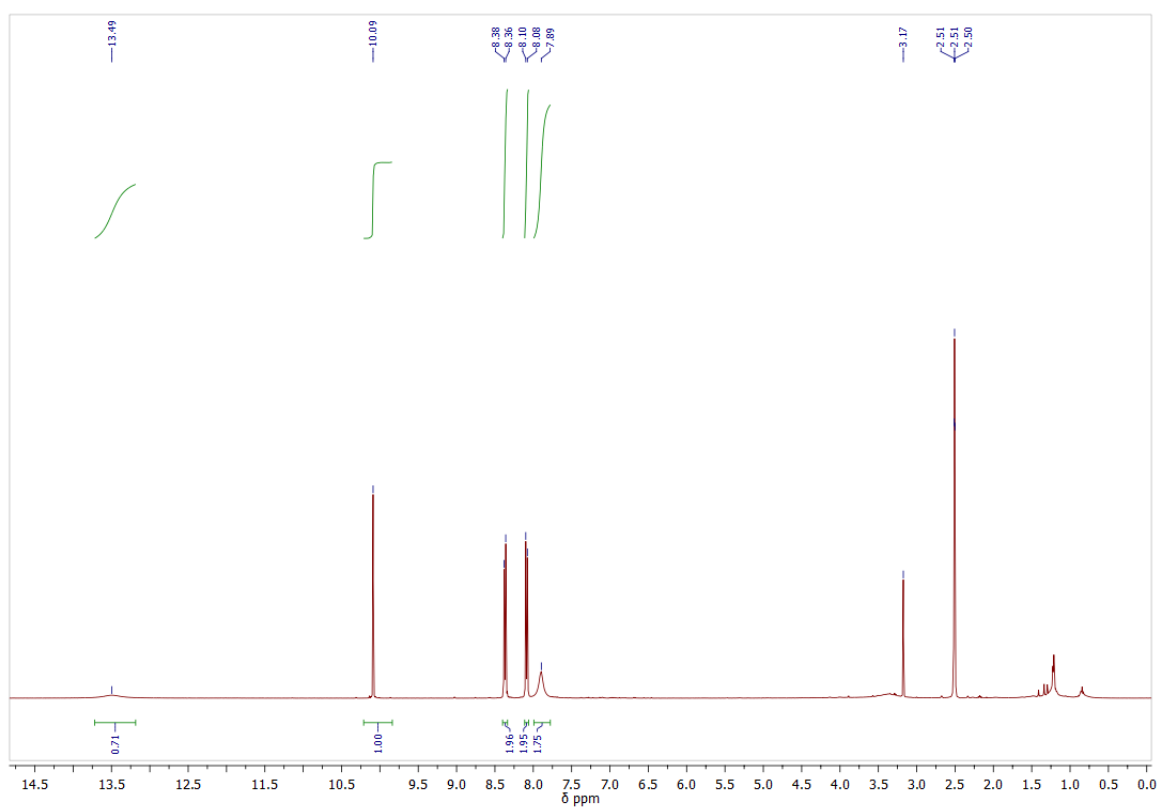

Fig. S2 <sup>1</sup>H NMR (500 MHz) spectrum of 1 in DMSO-d<sub>6</sub>.

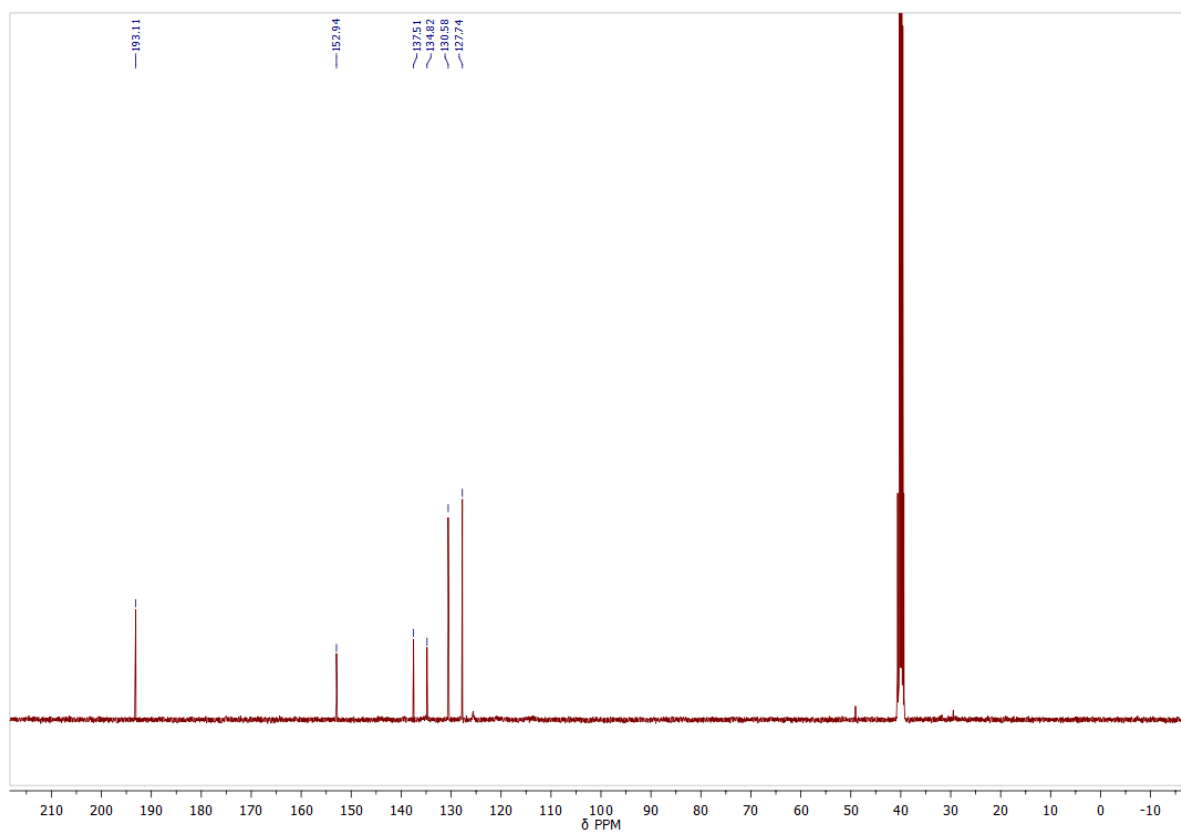

Fig. S3  $^{13}\text{C}$  NMR (125 MHz) spectrum of compound **1** in  $\text{DMSO-}d_6$ .

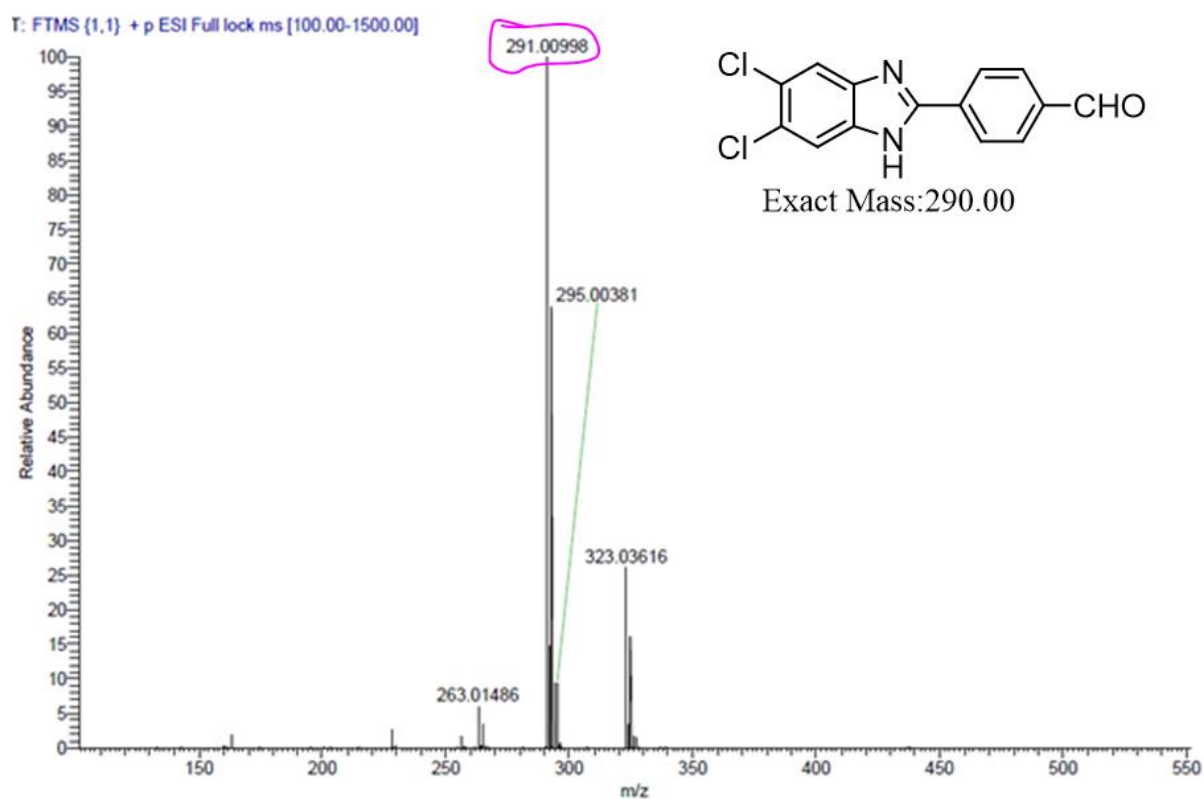

Fig. S4 HRMS spectrum of compound **1**.

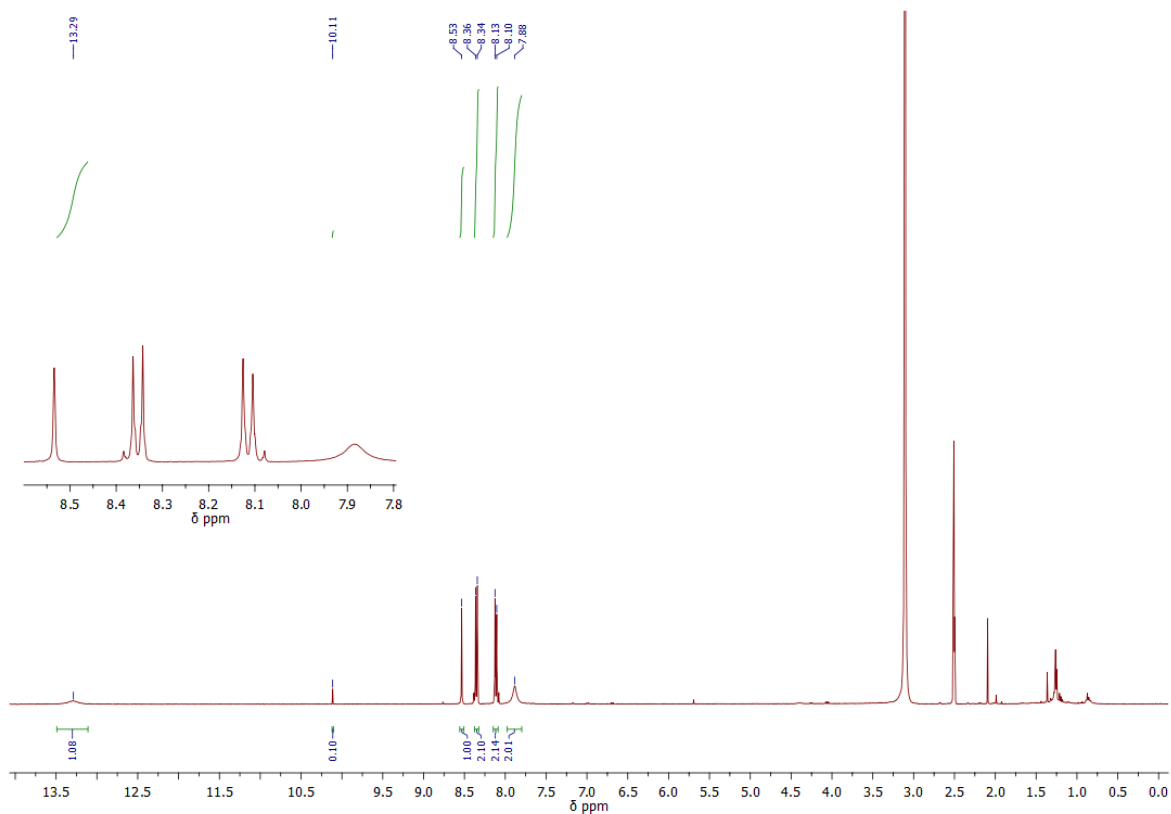

Fig. S5  $^1\text{H}$  NMR (500 MHz) spectrum of compound **R-1** in  $\text{DMSO-}d_6$ .

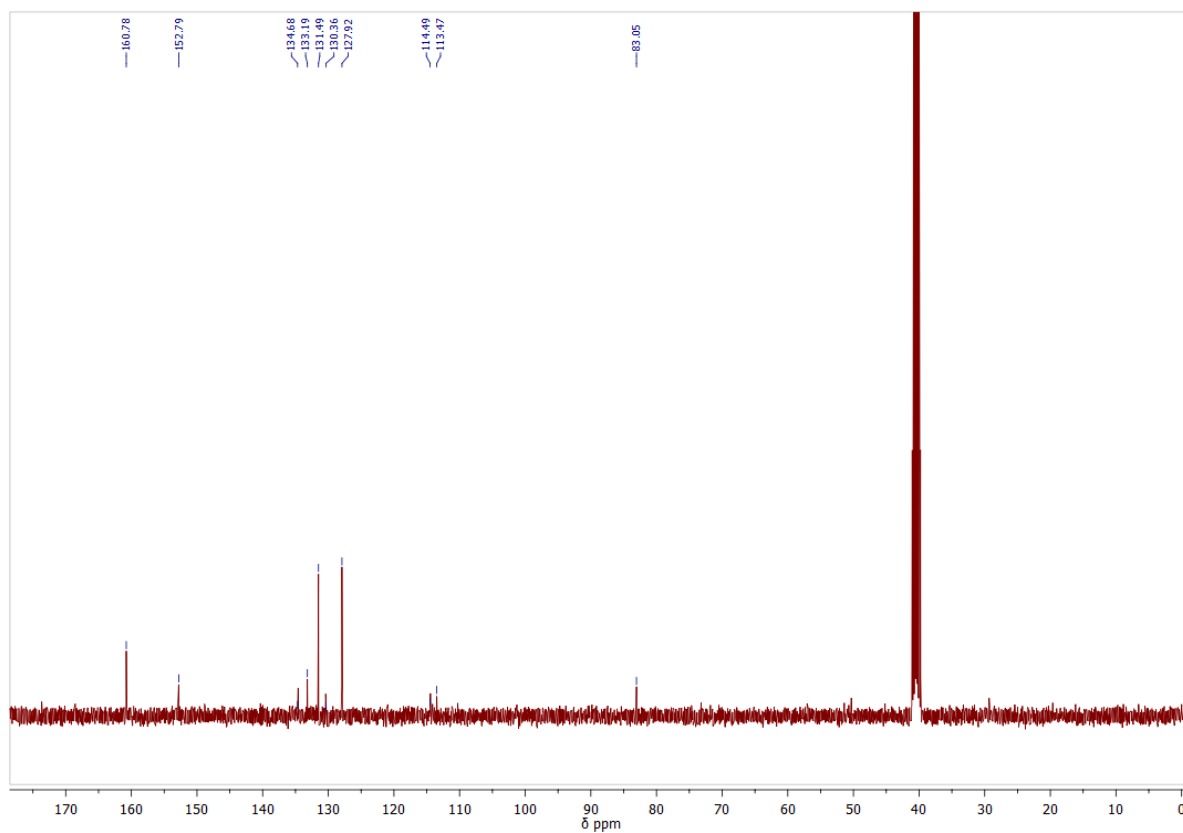

Fig. S6  $^{13}\text{C}$  NMR (125 MHz) spectrum of compound **R-1** in  $\text{DMSO-}d_6$ .

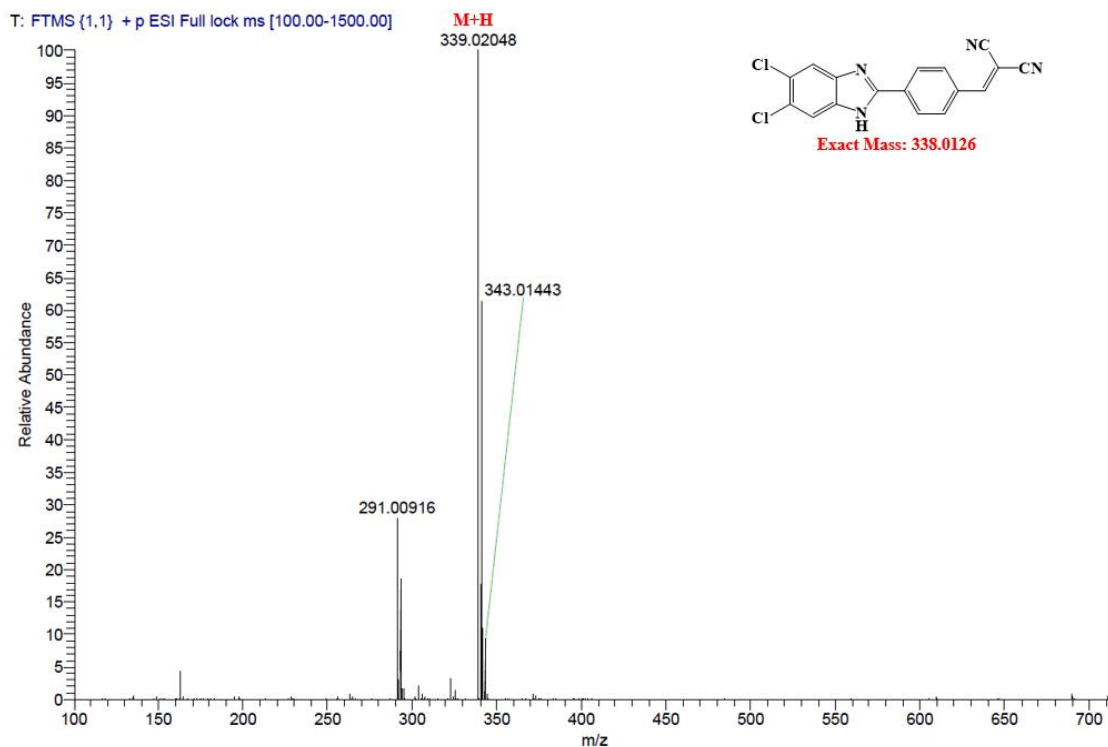

Fig. S7 HRMS spectrum of compound R-1.

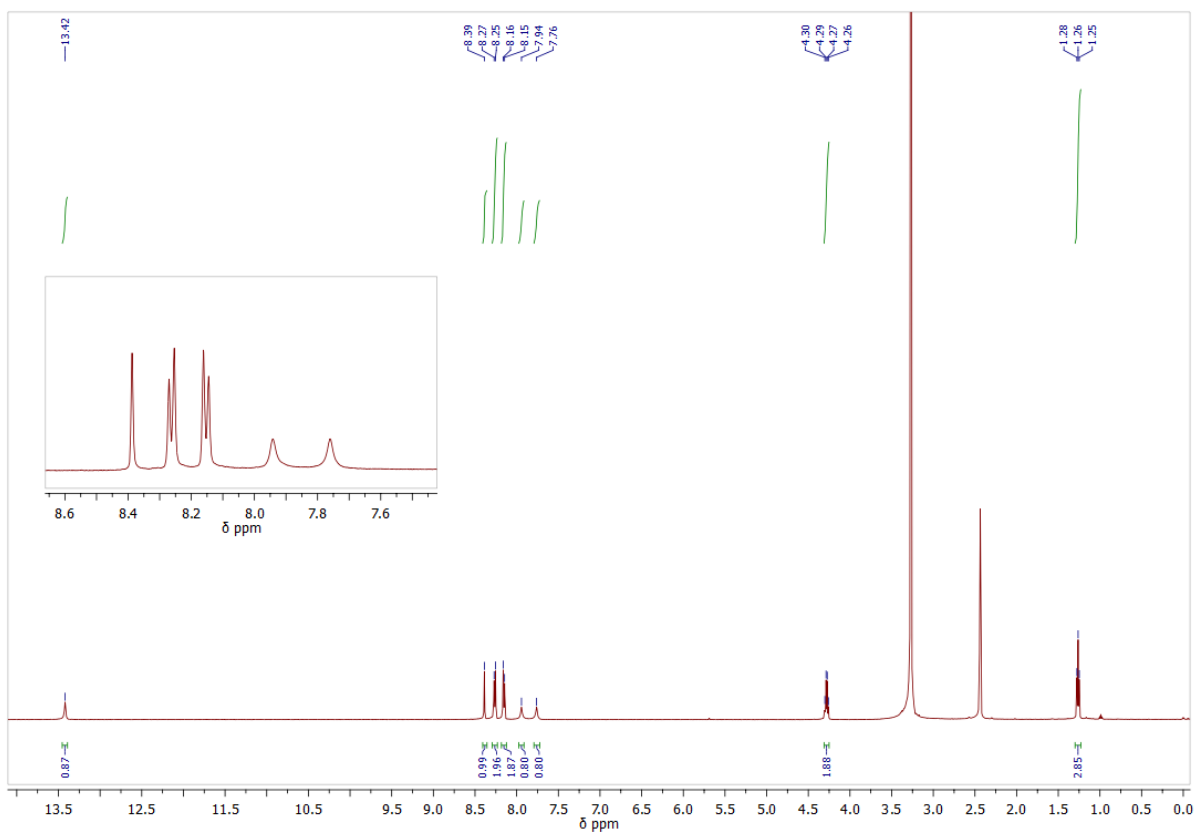

Fig. S8  $^1\text{H}$  NMR (500 MHz) spectrum of compound R-2 in  $\text{DMSO-}d_6$ .

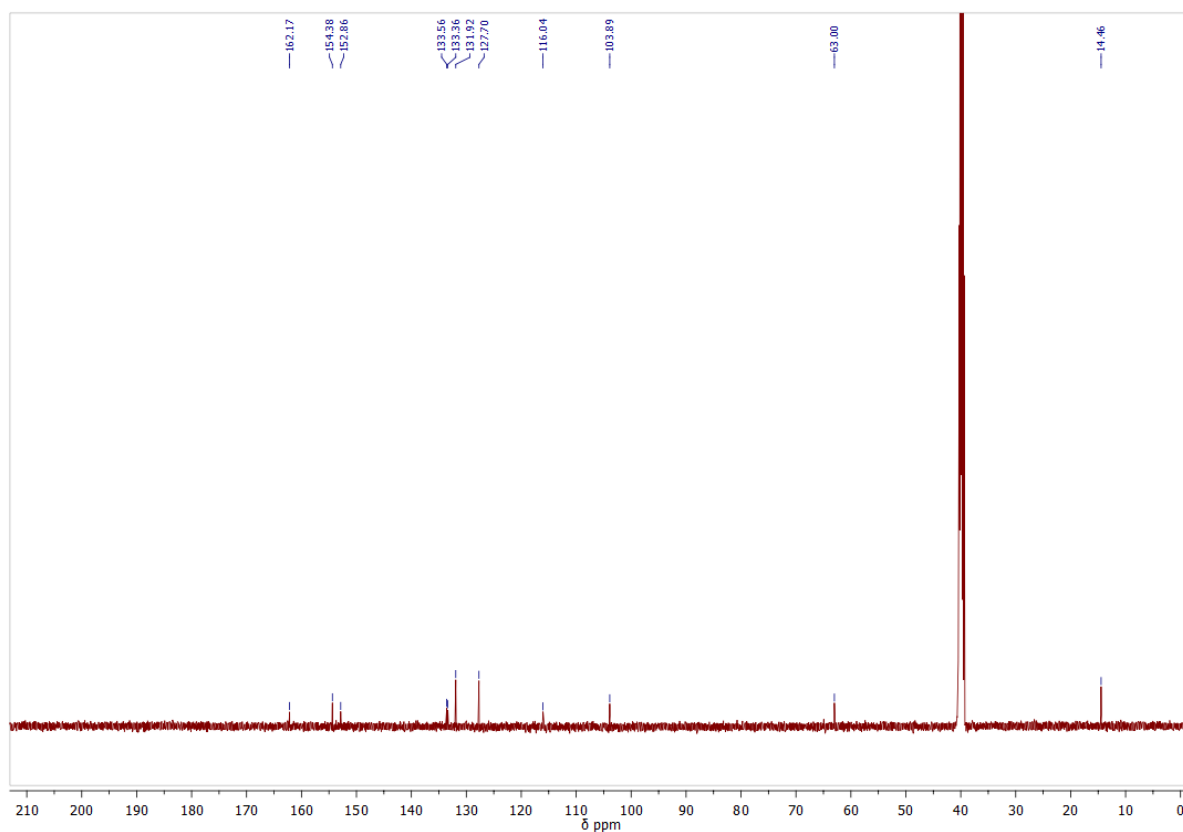

Fig. S9  $^{13}\text{C}$  NMR (125 MHz) spectrum of compound R-2 in  $\text{DMSO}-d_6$ .

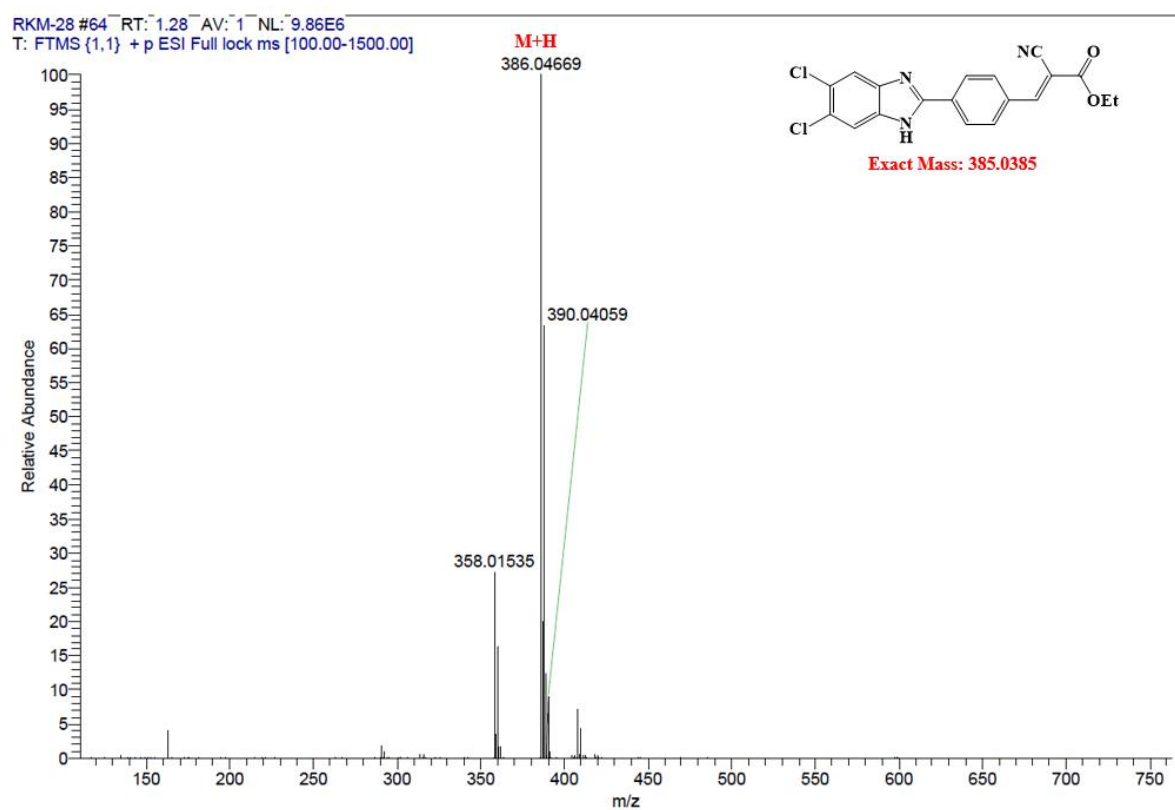

Fig. S10 HRMS spectrum of compound R-2.

## 2. Crystallographic data

### 2.1. Table S1. Selected crystallographic data of R-1 and R-2.

| Data                                                                          | R-1                                                                                             | R-2                                                                               |
|-------------------------------------------------------------------------------|-------------------------------------------------------------------------------------------------|-----------------------------------------------------------------------------------|
| Chemical formula                                                              | C <sub>17</sub> H <sub>8</sub> Cl <sub>2</sub> N <sub>4</sub> ·C <sub>3</sub> H <sub>7</sub> NO | 2(C <sub>19</sub> H <sub>13</sub> Cl <sub>2</sub> N <sub>3</sub> O <sub>2</sub> ) |
| Formula Mass                                                                  | 412.27                                                                                          | 772.45                                                                            |
| Crystal system                                                                | Triclinic                                                                                       | Triclinic                                                                         |
| <i>a</i> /Å                                                                   | 7.8572(2)                                                                                       | 9.7546(3)                                                                         |
| <i>b</i> /Å                                                                   | 10.5742(4)                                                                                      | 13.6517(4)                                                                        |
| <i>c</i> /Å                                                                   | 12.2644(3)                                                                                      | 15.5974(5)                                                                        |
| <i>α</i> /°                                                                   | 104.009(2)                                                                                      | 65.830(3)                                                                         |
| <i>β</i> /°                                                                   | 92.066(2)                                                                                       | 89.235(2)                                                                         |
| <i>γ</i> /°                                                                   | 102.979(3)                                                                                      | 70.210(2)                                                                         |
| Unit cell volume/Å <sup>3</sup>                                               | 958.99(5)                                                                                       | 1763.97(10)                                                                       |
| Temperature/K                                                                 | 293(2)                                                                                          | 293(2)                                                                            |
| Space group                                                                   | <i>P</i> 1̄                                                                                     | <i>P</i> 1̄                                                                       |
| No. of formula units per unit cell, <i>Z</i>                                  | 2                                                                                               | 2                                                                                 |
| Radiation type                                                                | MoKα                                                                                            | MoKα                                                                              |
| Absorption coefficient, μ/mm <sup>-1</sup>                                    | 0.360                                                                                           | 0.387                                                                             |
| No. of reflections measured                                                   | 12370                                                                                           | 24165                                                                             |
| No. of independent reflections                                                | 3904                                                                                            | 7447                                                                              |
| <i>R</i> <sub>int</sub>                                                       | 0.0476                                                                                          | 0.0470                                                                            |
| Final <i>R</i> <sub>1</sub> values ( <i>I</i> > 2σ( <i>I</i> ))               | 0.0493                                                                                          | 0.0502                                                                            |
| Final <i>wR</i> ( <i>F</i> <sup>2</sup> ) values ( <i>I</i> > 2σ( <i>I</i> )) | 0.1161                                                                                          | 0.1154                                                                            |
| Final <i>R</i> <sub>1</sub> values (all data)                                 | 0.0723                                                                                          | 0.0898                                                                            |
| Final <i>wR</i> ( <i>F</i> <sup>2</sup> ) values (all data)                   | 0.1329                                                                                          | 0.1329                                                                            |
| Goodness of fit on <i>F</i> <sup>2</sup>                                      | 1.049                                                                                           | 1.037                                                                             |
| CCDC No                                                                       | <b>2309138</b>                                                                                  | <b>2309139</b>                                                                    |

### 2.2. Table S2. Selected parameters for weak interactions in R-1 and R-2.

| R-1                                |                 |                                         | R-2                                  |                 |                                           |
|------------------------------------|-----------------|-----------------------------------------|--------------------------------------|-----------------|-------------------------------------------|
| Short Contact                      | Bond length (Å) | Symmetry Code                           | Short Contact                        | Bond length (Å) | Symmetry Code                             |
| N <sub>1</sub> ···O <sub>1</sub>   | 2.863           | <i>x</i> , <i>y</i> , <i>z</i>          | N <sub>2</sub> ···N <sub>24</sub>    | 2.906           | 2- <i>x</i> , - <i>y</i> , 1- <i>z</i>    |
| C <sub>17</sub> ···O <sub>1</sub>  | 3.136           | <i>x</i> , 1+ <i>y</i> , <i>z</i>       | H <sub>2</sub> ···N <sub>24</sub>    | 2.080           | 2- <i>x</i> , - <i>y</i> , 1- <i>z</i>    |
| Cl <sub>1</sub> ···C <sub>18</sub> | 3.377           | 1- <i>x</i> , - <i>y</i> , 1- <i>z</i>  | O <sub>22</sub> ···H <sub>14</sub>   | 2.611           | 2- <i>x</i> , 1- <i>y</i> , 1- <i>z</i>   |
| Cl <sub>2</sub> ···Cl <sub>2</sub> | 3.386           | 1- <i>x</i> , - <i>y</i> , - <i>z</i>   | O <sub>22</sub> ···H <sub>38</sub>   | 2.548           | <i>x</i> , <i>y</i> , <i>z</i>            |
| H <sub>1</sub> ···O <sub>1</sub>   | 2.028           | <i>x</i> , <i>y</i> , <i>z</i>          | C <sub>1</sub> ···H <sub>46B</sub>   | 2.877           | 2- <i>x</i> , 1- <i>y</i> , 1- <i>z</i>   |
| H <sub>1</sub> ···C <sub>18</sub>  | 2.598           | <i>x</i> , <i>y</i> , <i>z</i>          | Cl <sub>51</sub> ···H <sub>47A</sub> | 2.852           | -1+ <i>x</i> , -1+ <i>y</i> , 1+ <i>z</i> |
| H <sub>13</sub> ···O <sub>1</sub>  | 2.580           | <i>x</i> , <i>y</i> , <i>z</i>          | Cl <sub>52</sub> ···Cl <sub>52</sub> | 3.283           | - <i>x</i> , 1- <i>y</i> , 2- <i>z</i>    |
| N <sub>2</sub> ···H <sub>18</sub>  | 2.465           | 1- <i>x</i> , 1- <i>y</i> , 1- <i>z</i> | C <sub>33</sub> ···H <sub>38</sub>   | 2.842           | 1- <i>x</i> , 1- <i>y</i> , 1- <i>z</i>   |
|                                    |                 |                                         | N <sub>28</sub> ···N <sub>50</sub>   | 2.952           | 1- <i>x</i> , 2- <i>y</i> , 1- <i>z</i>   |
|                                    |                 |                                         | N <sub>50</sub> ···H <sub>28</sub>   | 2.079           | 1- <i>x</i> , 2- <i>y</i> , 1- <i>z</i>   |



### 3. Theoretical Data

**3.1. Table S3:** Comparison of absorption properties of **R-1**, **R-1-N<sub>2</sub>H<sub>4</sub>** and **R-2** with the simulated excitation energy, oscillator strength and percentage contributions of the orbital for different transitions.

| Compound                              | Experimental          | Theoretical    |        |                             |          |       |
|---------------------------------------|-----------------------|----------------|--------|-----------------------------|----------|-------|
|                                       | $\lambda_{\max}$ (nm) | $\lambda$ (nm) | $f$    | Orbitals & Contribution (%) |          |       |
| <b>R-1</b>                            | 380                   | 421.00         | 0.9096 | HOMO                        | → LUMO   | 99.14 |
|                                       |                       | 387.46         | 0.0041 | HOMO-1                      | → LUMO   | 99.19 |
|                                       |                       | 310.96         | 0.4718 | HOMO-3                      | → LUMO   | 12.07 |
|                                       |                       |                |        | HOMO-2                      | → LUMO   | 76.84 |
|                                       |                       |                |        | HOMO                        | → LUMO+1 | 09.85 |
| <b>R-1+N<sub>2</sub>H<sub>4</sub></b> | 345                   | 340.30         | 1.3091 | HOMO                        | → LUMO   | 97.53 |
|                                       |                       | 298.95         | 0.0162 | HOMO-1                      | → LUMO   | 93.29 |
|                                       |                       | 287.73         | 0.0202 | HOMO-2                      | → LUMO   | 79.62 |
|                                       |                       |                |        | HOMO                        | → LUMO+1 | 16.85 |
|                                       |                       |                |        | HOMO                        | → LUMO+1 | 16.16 |
| <b>R-2</b>                            | 370                   | 371.28         | 1.2061 | HOMO                        | → LUMO   | 98.47 |
|                                       |                       | 326.09         | 0.0065 | HOMO-1                      | → LUMO   | 97.55 |
|                                       |                       | 303.76         | 0.2233 | HOMO-2                      | → LUMO   | 81.03 |
|                                       |                       |                |        | HOMO                        | → LUMO+1 | 16.16 |
|                                       |                       |                |        | HOMO                        | → LUMO+1 | 16.16 |

**3.2. Table S4:** Comparison of emission properties of **R-1**, **R-1-N<sub>2</sub>H<sub>4</sub>** and **R-2** with the simulated emission wavelength, oscillator strength and orbital involved.

| Compound                              | Emission Wavelength, $\lambda_{em}$ (nm) |             |                    |                                                                                                                                                           |
|---------------------------------------|------------------------------------------|-------------|--------------------|-----------------------------------------------------------------------------------------------------------------------------------------------------------|
|                                       | Experimental                             |             |                    | Theoretical                                                                                                                                               |
|                                       | DMSO                                     | Solid State | R-1 <sub>Gel</sub> | Oscillator Strength and Orbitals involved                                                                                                                 |
| <b>R-1</b>                            | 560                                      | 550         | 540                | 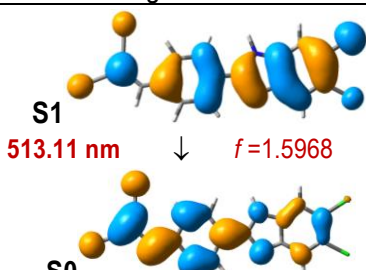 <p><b>S1</b><br/>513.11 nm ↓ <math>f=1.5968</math><br/><b>S0</b></p> |
| <b>R-1+N<sub>2</sub>H<sub>4</sub></b> | 405 & 428                                | 438*        | 468                |  <p><b>S1</b><br/>434.26 nm ↓ <math>f=1.9046</math><br/><b>S0</b></p> |
| <b>R-2</b>                            | 540                                      | 485 & 510   | -                  |  <p><b>S1</b><br/>480.63 nm ↓ <math>f=1.7689</math><br/><b>S0</b></p> |

\*In case of **R-2** the intensity at 485 & 510 is reduced as it took longer time to complete the reaction.

#### 4. Aggregation studies of compounds R-1 and R-2

The fluorescence properties of **R-1** and **R-2** have been investigated in DMSO/water solvent mixtures in order to evaluate their Aggregation Induced Emission (AIE) properties. As shown in Figure S11, **R-1** is strongly emissive in pure DMSO, while increasing the water content in DMSO/water mixtures from 0 to 90%, the fluorescence intensity was first increased (up to 30% water content) and was reduced and blue shifted there after (up to 90% composition of water). Similarly the **R-2** was found to be strongly emissive in the 80% water/DMSO mixture.

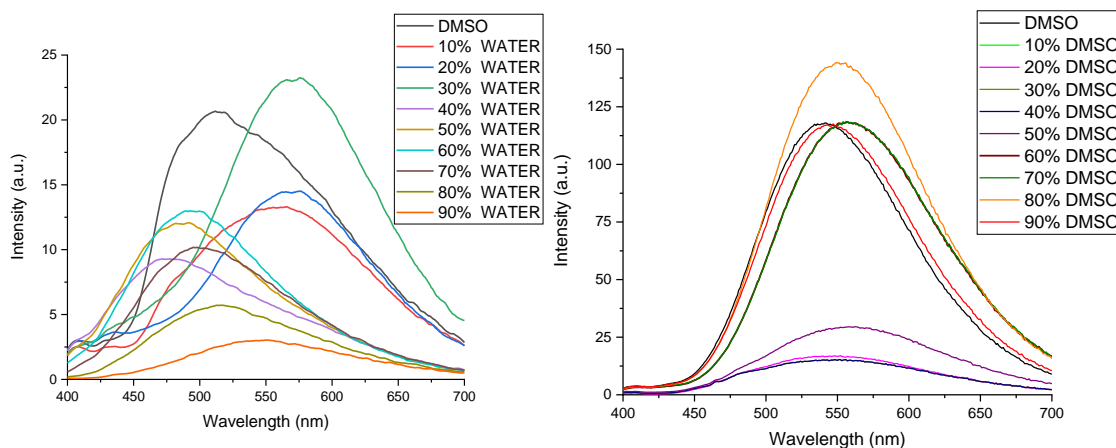

**Fig. S11** Fluorescence spectra of a) **R-1** and b) **R-2** in DMSO-Water mixtures with different water fractions ( $\lambda_{\text{ex}} = 370$  nm).

##### 4.1. Viscosity experiments and lifetime studies

The **R-1** and **R-2** both planer molecule and represents the D- $\pi$ -A type rotor through the  $\pi$ -conjugated linker. The rotatable parts, including the benzene rings and linker of  $\pi$ -bridge (carbon-carbon double bond), can rotate freely in low-viscous media, resulting in a non-radiative quenching of the excited state and consequently are less or non-emissive. While, in high-viscous media, intramolecular motions are inhibited, and energy is released through radiative decay, resulting in stronger fluorescence.

Considering this, the viscosity-responsive optical performance was investigated in more detail with a methanol-glycerol system with various glycerol fractions ( $f_G = 0-90$ , vol%). As **R-2** showed better AIE properties, in order to explore the mechanism, fluorescence change of probe **R-2** for was monitored at different glycerol-MeOH fractions ( $f_G = 0-90$ , vol%). It was observed that on increasing the glycerine content ( $0 \rightarrow 90$ , vol%), the emission intensity at 540 nm has increased (**Fig. S12a**). The signal was rather weak up to  $f_G = 60\%$ , while the intensity increased sharply with a higher  $f_G$  exceeding  $60\%$ , and it reached nearly 2-fold in the mixed solution with  $f_G = 90\%$ . The enhancement in emission has also been supported by the lifetime measurement data of **R-2** ( $\tau_{\text{av}} = 5.44$  ns,  $f_G = 0$ ;  $\tau_{\text{av}} = 21.47$  ns,  $f_G = 90$ ) and **R-1** ( $\tau_{\text{av}} = 12.32$  ns,  $f_G = 0$ ;  $\tau_{\text{av}} = 16.78$  ns,  $f_G = 90$ ) in viscous medium which showed the enhanced life time due to aggregation (**Fig. S12c** and **12d**).

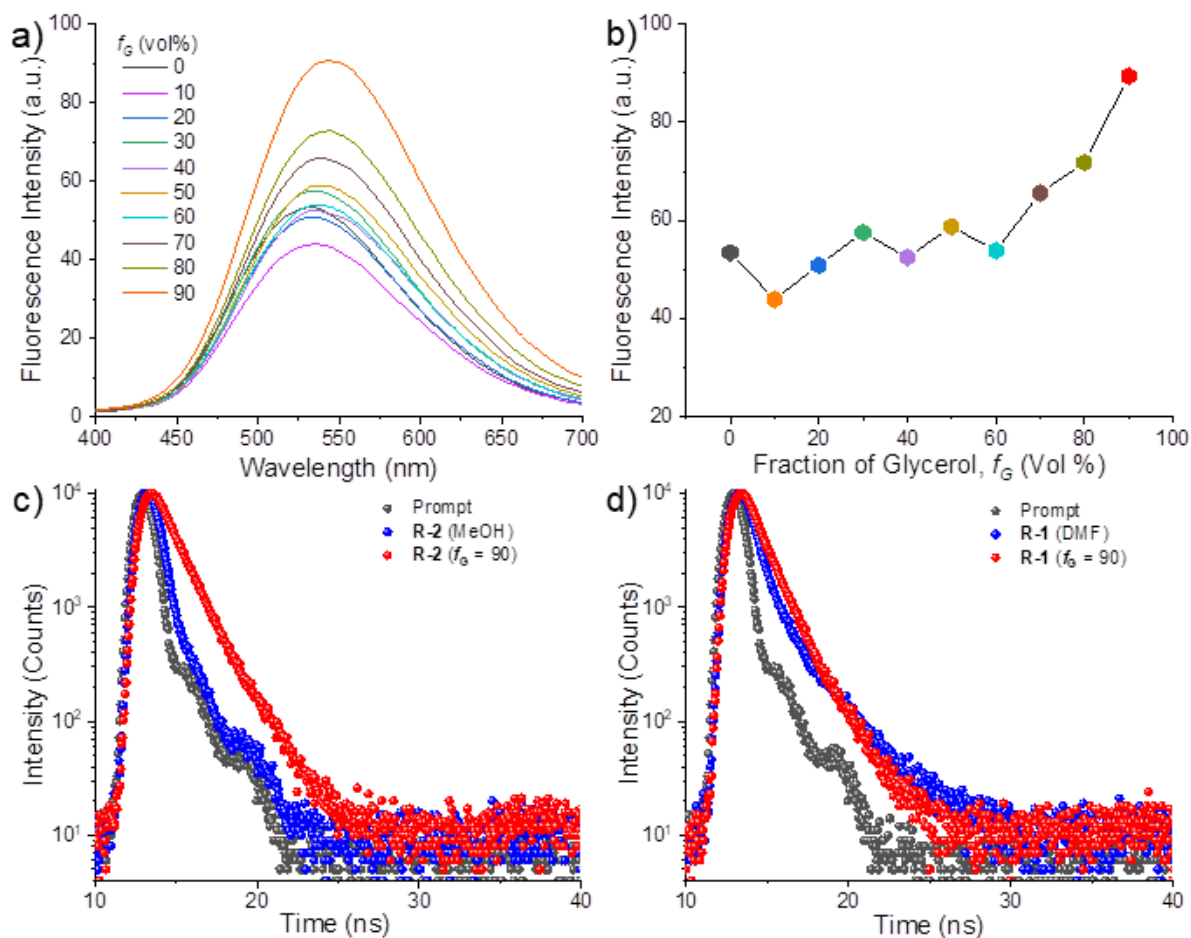

**Fig. S12** a) Fluorescence ( $\lambda_{\text{ex}} = 370$  nm) spectra of **R-2** (30  $\mu\text{M}$ ) with different glycerol fraction ( $f_G = 0-90$ , vol%), b) Change in intensity at 540 nm with respect to different glycerol fraction ( $f_G = 0-90$ , vol%), c) Lifetime ( $\lambda_{\text{ex}} = 370$  nm) recorded for **R-2** in MeOH and 90% glycerol-MeOH ( $f_G = 90$ ) **R-2** and d) lifetime ( $\lambda_{\text{ex}} = 370$  nm) recorded for **R-1** in DMF and 90% glycerol-DMF ( $f_G = 90$ ) medium.

#### 4.1. Scheme showing the mechanism of the enhanced emission of **R-1** and **R-2**

Thus the above experiments support that enhanced emission is observed due to the restricted intermolecular rotation (RIR) in both **R-1** and **R-2** (Scheme S1)

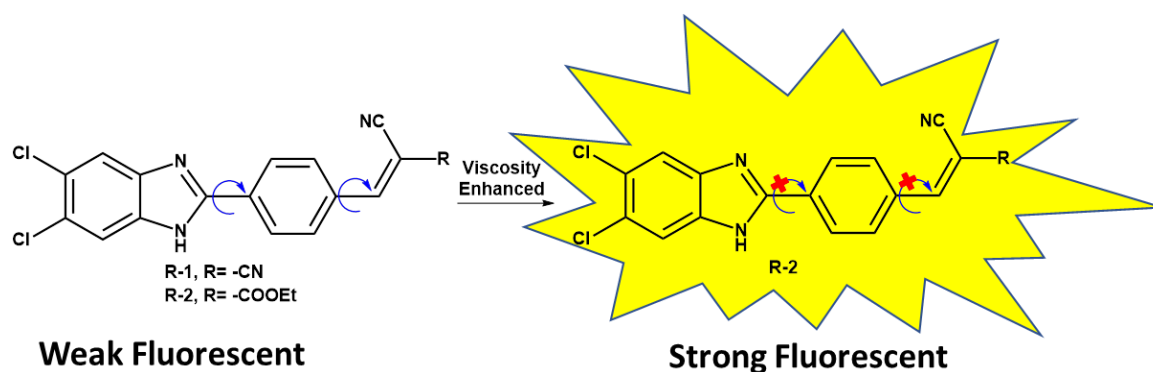

**Scheme S1.** Mechanism of the enhanced emission of **R-1** and **R-2**.

## 5. Fluorescence Titration Studies of R-2

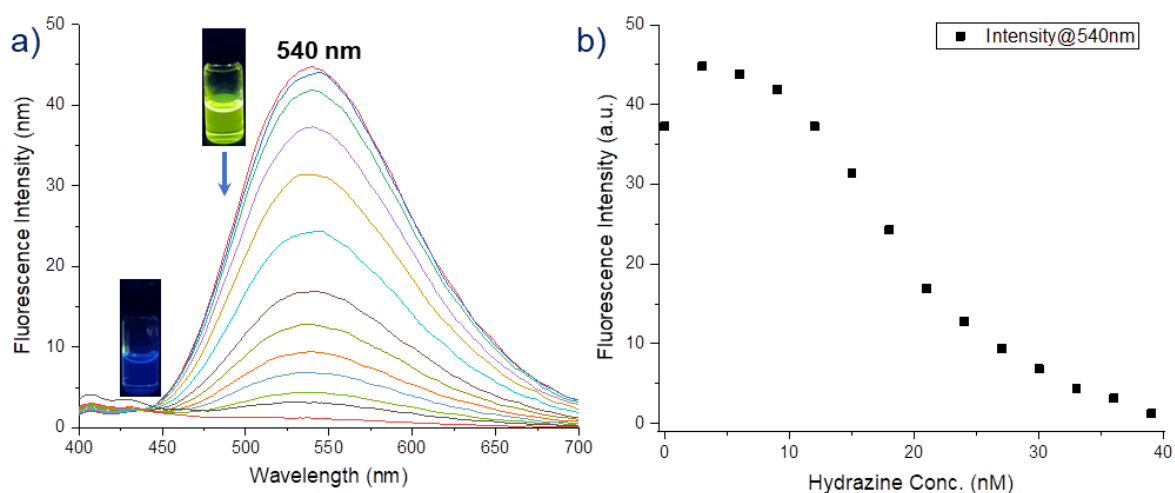

**Fig. S13** a) Fluorescence ( $\lambda_{\text{ex}} = 370 \text{ nm}$ ) spectra of **R-2** ( $30 \mu\text{M}$ , DMSO) with increasing concentration of  $\text{N}_2\text{H}_4$  (0.0 to 40 nM), b) Change in intensity at 540 nm with after addition of  $\text{N}_2\text{H}_4$  (0.0 to 40 nM).

## 6. Table S5. Comparison data of previously reported $\text{N}_2\text{H}_4$ sensors with current data

| S. No. | Probe Structure | Wavelength (nm), $\lambda$ |                                           | Detection Limit                 | Response Time | Application                             | Year | Reference No |
|--------|-----------------|----------------------------|-------------------------------------------|---------------------------------|---------------|-----------------------------------------|------|--------------|
|        |                 | Excitation (Probe)         | Emission (Probe+ $\text{N}_2\text{H}_4$ ) |                                 |               |                                         |      |              |
| 1.     |                 | 395                        | 460                                       | 3.4 nM<br>(0.11 ppb)            | 2–3 min       | -                                       | 2013 | 1            |
| 2.     |                 | 350                        | 510 & 400                                 | $1.79 \times 10^{-9} \text{ M}$ | 40 s          | Test Strips,<br>HeLa cells              | 2016 | 2            |
| 3.     |                 | 430                        | 500                                       | 22.5 nM<br>(0.716 ppb)          | 2 h           | Test Strips,<br>RAW264.7 Cells          | 2017 | 3            |
| 4.     |                 | 520                        | 545                                       | 26 nM<br>(0.83 ppb)             | 5 min         | Paper Strips, &<br>HepG2 Cells          | 2018 | 4            |
| 5.     |                 | 327                        | 456                                       | 1.9 nM<br>(0.06 ppb)            | 1 & 8<br>min  | Real Water<br>Samples and TLC<br>Plates | 2018 | 5            |
| 6.     |                 | 670                        | 701                                       | 0.78 ppb                        | 1 h           | Mouse Liver<br>Slices                   | 2018 | 6            |

|     |                                                                                     |     |           |                                                                       |                  |                                                                |      |    |
|-----|-------------------------------------------------------------------------------------|-----|-----------|-----------------------------------------------------------------------|------------------|----------------------------------------------------------------|------|----|
| 7.  | 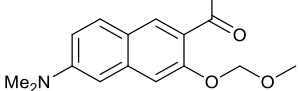   | 391 | 496       | 0.035 ppb                                                             | 60 min           | Paper Strip, Soil Analysis, Spray Application, Tissues Imaging | 2019 | 7  |
| 8.  |    | 375 | 450       | 0.0047 $\mu\text{M}$<br>(1.5 ppb)                                     | 3 h              | Tap Water and River Water Samples                              | 2020 | 8  |
| 9.  |    | 500 | 651       | 0.09 $\mu\text{M}$<br>(2.87 ppb)                                      | 1 h              | Tap Water and River Water Samples; LO2 Cells                   | 2020 | 9  |
| 10. |    | 300 | 495 & 580 | 96.3 nM                                                               | 40 s             | TLC Plates, HeLa Cells                                         | 2020 | 10 |
| 11. |    | 380 | 470       | $7.9 \times 10^{-8}$ M                                                | 20 min           | Lake Water & Mung Beans                                        | 2020 | 11 |
| 12. |   | 370 | 604 & 442 | 42.5 nM                                                               | 30 min           | TLC Plate & U937 Cells                                         | 2020 | 12 |
| 13. |  | 365 | 530       | 2.6 $\mu\text{M}$                                                     | 5 min            | TLC Plates & MCF-7 Cells                                       | 2020 | 13 |
| 14. |  | 360 | 448       | 1.45 nM<br>(0.04 ppb)                                                 | 10 s             | Silica, Filter Paper, HeLa Cells                               | 2020 | 14 |
| 15. |  | 366 | 500 & 456 | 1: 8.4 ppb<br>2: 8.7 ppb                                              | 2 min            | Distilled Water, Tap Water, River Water & MCF-7 Cells          | 2020 | 15 |
| 16. |  | 350 | 460       | 8.47 nM                                                               | 3 min            | Ground Water, Tap Water, River Water & HeLa Cells              | 2020 | 16 |
| 17. |  | 515 | 645 & 565 | 0.08 $\mu\text{M}$<br>( $2.56 \times 10^{-3}$ $\mu\text{g mL}^{-1}$ ) | 35 min<br>(max.) | Drinking Water & HepG2 Cells                                   | 2021 | 17 |

|     |                                                                                     |         |                  |                         |         |                                                                             |      |           |
|-----|-------------------------------------------------------------------------------------|---------|------------------|-------------------------|---------|-----------------------------------------------------------------------------|------|-----------|
| 18. | 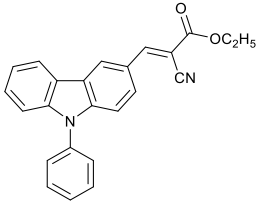   | 390     | 445 & 535        | $1.5 \times 10^{-6}$ M  | <100 s  | Paper Strips, Mung Bean Sprouts, Water Samples RAW264.7 Cells and Zebrafish | 2021 | 18        |
| 19. |    | 390     | 446              | 1.7 nM                  | ~1 min  | Filter Paper Strips and MDA-MB 231 cells                                    | 2022 | 19        |
| 20. |    | 500     | 586              | 7.8 nM                  | 80 s    | HeLa and HepG2 cells                                                        | 2022 | 20        |
| 21. |   | 420     | 576, 415 and 393 | 1.9 nM,                 | 15 min  | Tap water, River Water, and Soil Sample                                     | 2022 | 21        |
| 22. |  | 354     | 475              | 6.7 ppb                 | 60 min  | HepG2 Cells                                                                 | 2022 | 22        |
| 23. |  | 400/470 | 496 & 560        | $0.32 \mu\text{M}$      | 90 min  | TLC plate, Cotton Swab, Soil Sample, HeLa cells                             | 2023 | 23        |
| 24. |  | 590     | 725              | $4.5 \times 10^{-10}$ M | 0-40 s  | TLC & Paper Strips, Water and Soil Samples, MDA-MB-231 cancer cells         | 2023 | 24        |
| 25. |  | 340     | 375              | 340 nM (10 ppb)         | 10 min  | lipid droplets, C. elegans and zebrafish                                    | 2023 | 25        |
| 26. |  | 370     | 550              | 0.08 ppb                | 1-2 min | Polymer Film, C6 (glial) cells                                              | 2024 | This Work |

## 7. Sensitivity of R-1 towards hydrazine vapour

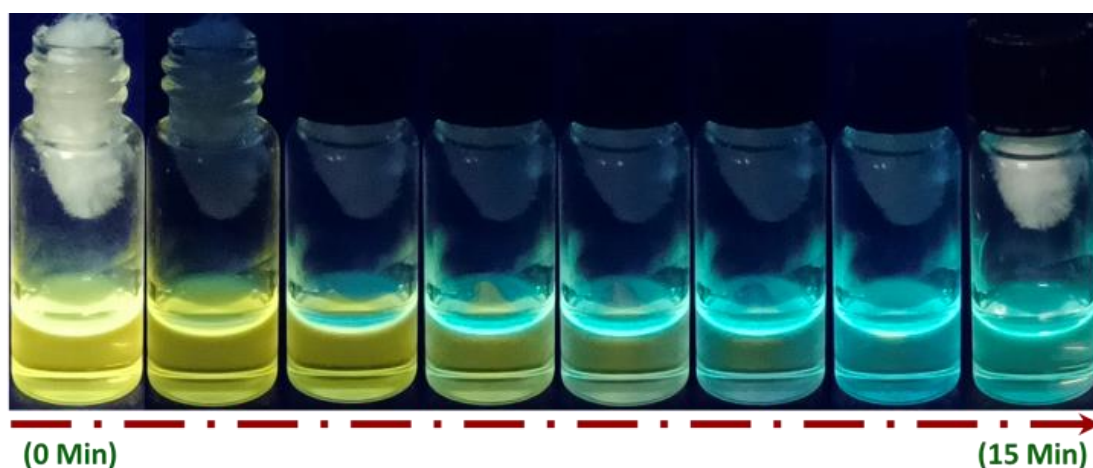

Fig. S14 Demonstration of the yellow fluorescence quenching (R-1) by hydrazine vapour.

## 8. HRMS spectrum of R-1-N<sub>2</sub>H<sub>4</sub> product

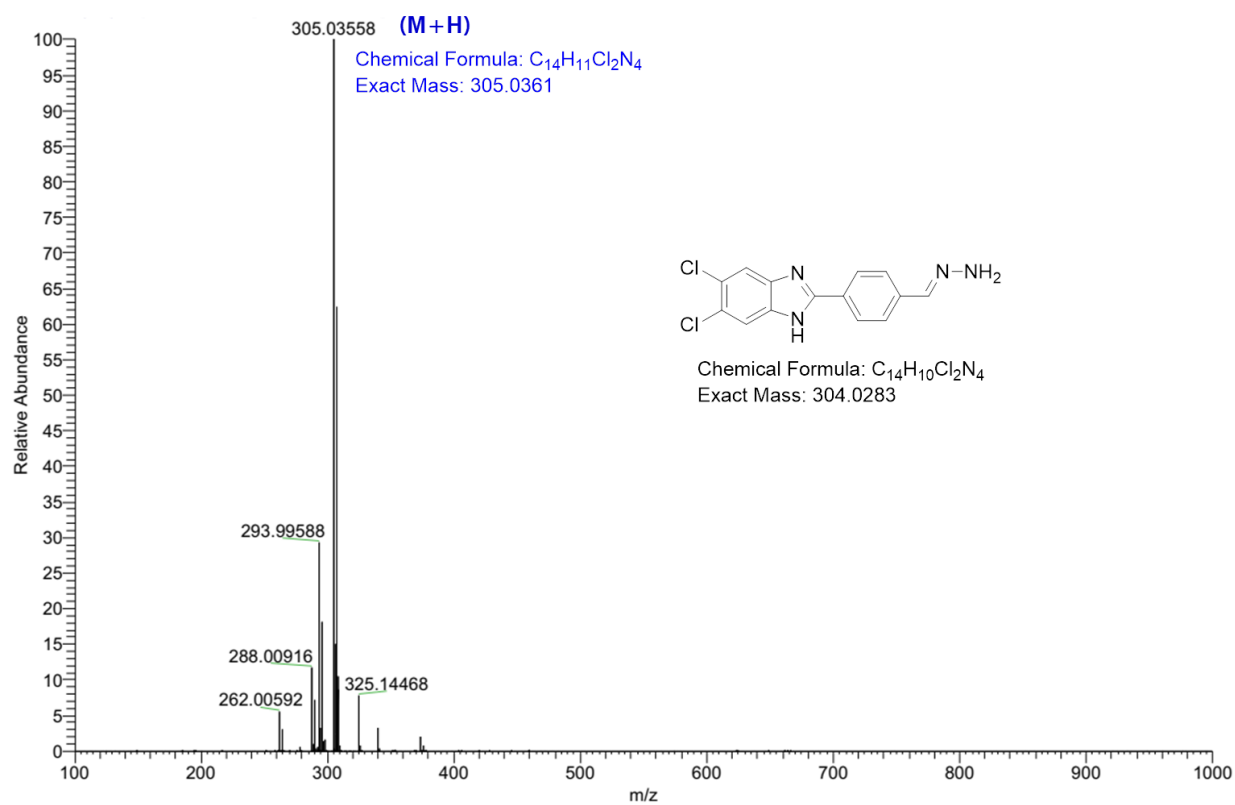

Fig. S15 HRMS spectrum of R-1-N<sub>2</sub>H<sub>4</sub> adduct.

## 9. Optimized structure of R-1-N<sub>2</sub>H<sub>4</sub> product and HOMO, LUMO

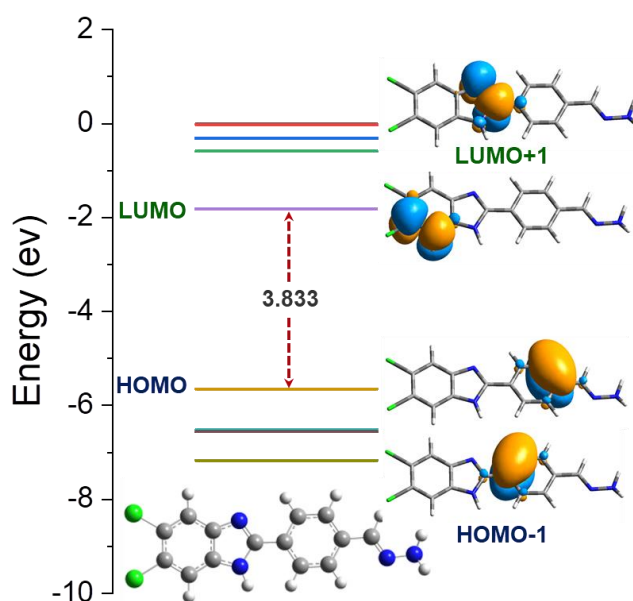

**Fig. S16** The optimized structure of R-1-N<sub>2</sub>H<sub>4</sub>. The schematic representation of relative energy levels of the important orbitals as well as electronic distributions observed in frontier orbitals (HOMO, HOMO+1, LUMO and LUMO+1) of R-1-N<sub>2</sub>H<sub>4</sub> with band gap values using DFT/B3LYP/6-31G\*\*.

## 10. Solid-state sensing studies of N<sub>2</sub>H<sub>4</sub>

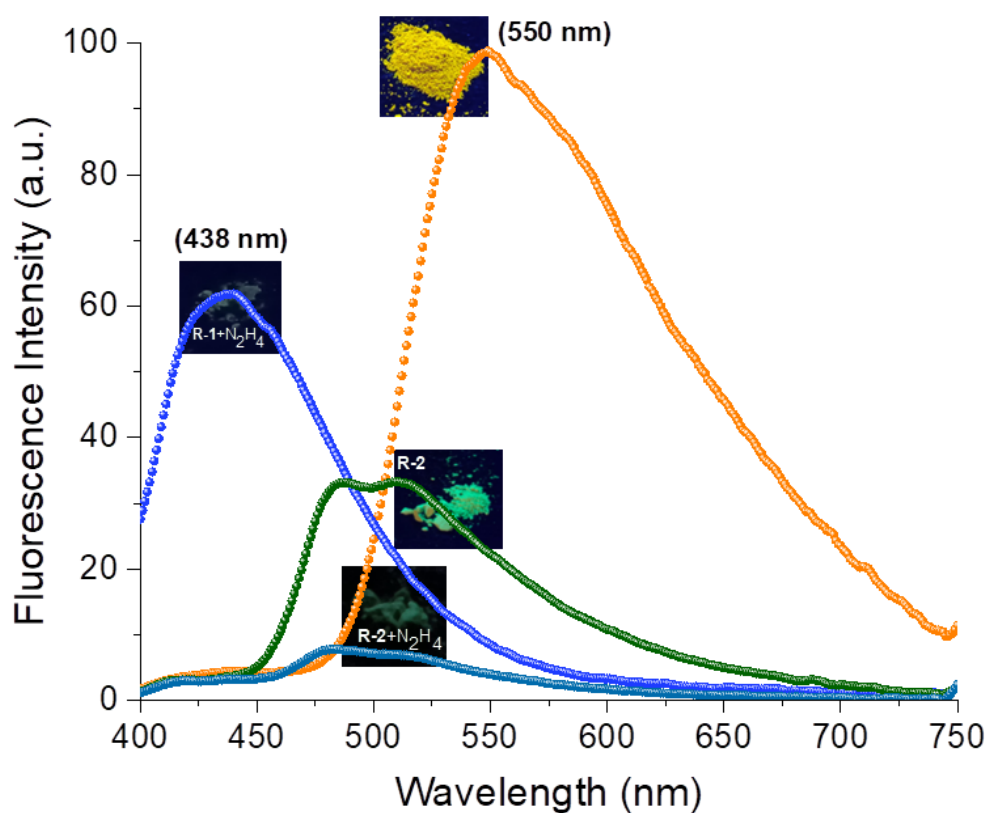

**Fig. S17** Fluorescence spectra of R-1 and R-2 in solid state ( $\lambda_{ex} = 380$  nm) and after addition of excess of hydrazine and the corresponding visual change in the fluorescence of R-1 and R-2.



## 11. Temperature-dependant <sup>1</sup>H NMR studies of R-1

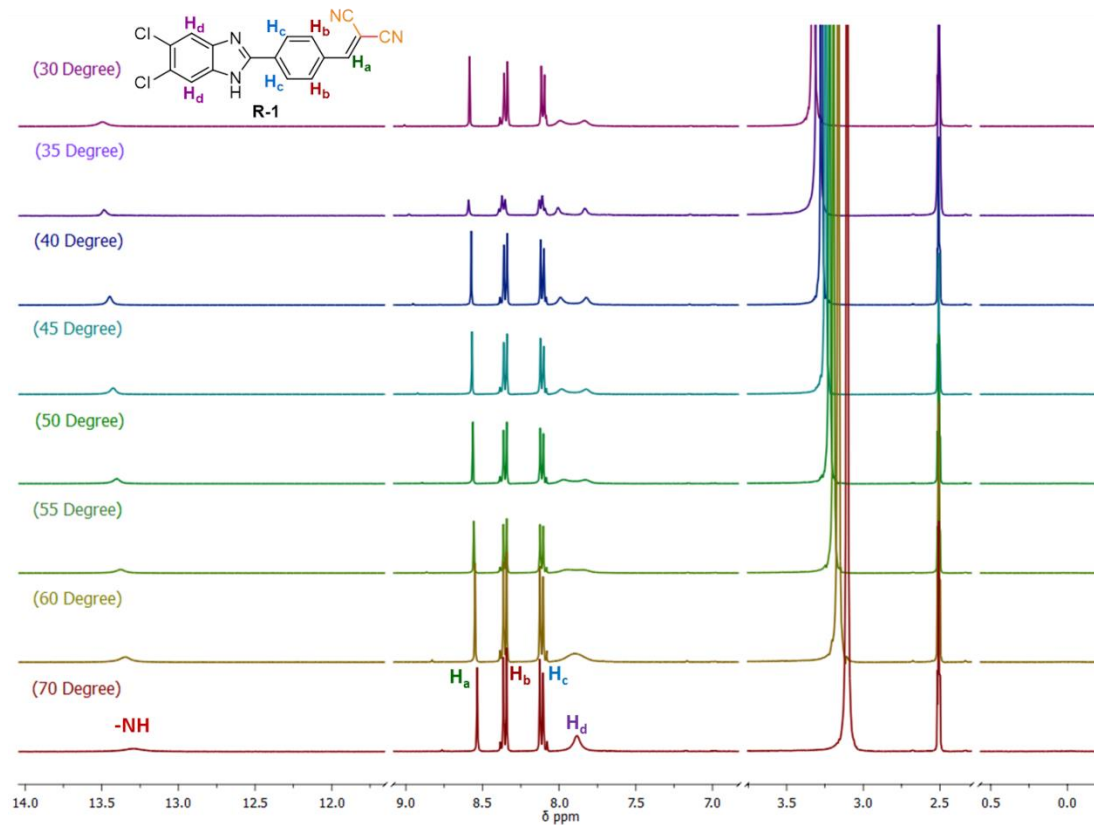

Fig. S18 Temperature Dependant <sup>1</sup>H NMR Studies of R-1 in DMSO-d<sub>6</sub> at different temperature.

## 12. Cytotoxicity of R-1

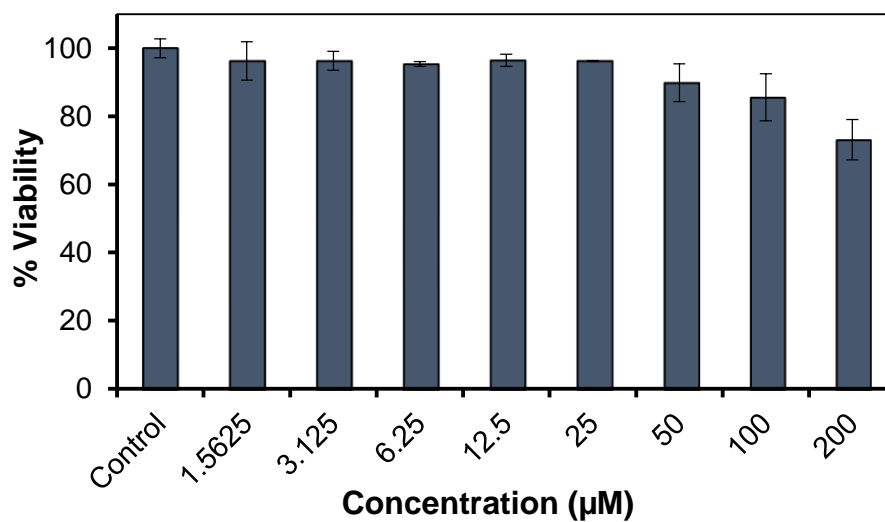

Fig. S19 in vitro cytotoxicity in c6 cells treated with R-1 at different concentrations.

### 13. Supplementary information references

1. Y. Tan, J. Yu, J. Gao, Y. Cui, Y. Yang and G. Qian, *Dye. Pigment.*, 2013, **99**, 966–971.
2. Shweta, A. Kumar, Neeraj, S. K. Asthana, A. Prakash, J. K. Roy, I. Tiwari, and K. K. Upadhyay, *RSC Adv.*, 2016, **6**, 94959–94966.
3. J. Cui, G. Gao, H. Zhao, Y. Liu, H. Nie and X. Zhang, *New J. Chem.*, 2017, **41**, 11891–11897.
4. K. Tiensomjit, R. Noorat, S. Chomngam, K. Wechakorn, S. Prabpai, P. Kanjanasirirat, Y. Pewkliang, S. Borwornpinyo and P. Kongsaree, *Spectrochim. Acta Part A Mol. Biomol. Spectrosc.*, 2018, **195**, 136–141.
5. Y. Zhang, Y. Huang, Y. Yue, J. Chao, F. Huo and C. Yin, *Sensors Actuators, B Chem.*, 2018, **273**, 944–950.
6. S. Wang, S. Ma, J. Zhang, M. She, P. Liu, S. Zhang and J. Li, *Sensors Actuators, B Chem.*, 2018, **261**, 418–424.
7. Y. Jung, I. G. Ju, Y. H. Choe, Y. Kim, S. Park, Y.-M. Hyun, M. S. Oh, and D. Kim, *ACS Sens.* 2019, **4**, 441–449.
8. J. Xingzonga, L. Zhena, S. Mingqina, Y. Silib, Z. Xiaoyanga, Z. Yonglea, and H. Linxi, *Microchem. J.*, 2020, **152**, 104376.
9. C. Wu, R. Xie, X. Pang, Y. Li, Z. Zhou and H. Li, *Spectrochim. Acta Part A Mol. Biomol. Spectrosc.*, 2020, 118764.
10. Q. Jiang, Z. Wang, M. Li, J. Song, Y. Yang, X. Xu, H. Xu and S. Wang, *Tetrahedron Lett.*, 2020, **61**, 152103.
11. H. Yang, M. Li, Y. Zhang, S. Ruan, J. Yin, J. Song, Y. Yang, Z. Wang and S. Wang, *J. Lumin.*, 2020, **226**, 117436.
12. X. Li, J. Gu, H. Huang, Z. Zhou, J. Gao and Q. Wang, *Dye. Pigment.*, 2020, **181**, 108545.
13. J.-T. Hou, B. Wang, S. Wang, Y. Wu, Y.-X. Liao and W. X. Ren, *Dye. Pigment.*, 2020, **178**, 108366.
14. Z. Guo, Q. Niu, Q. Yang, T. Li, T. Wei, L. Yang, J. Chen and X. Qin, *Anal. Chim. Acta*, 2020, **1123**, 64–72.
15. B. B. Pavankumar, P. Ranjan, P. C. Jha and A. Sivaramakrishna, *Analyst*, 2020, **145**, 4615–4626.
16. X. Wang, G. Ding, Y. Wang, S. Mao, K. Wang and Z. Ge, Y. Zhang, X. Li, C.-H. Hung, *Tetrahedron*, 2020, **76**, 131726.
17. S. Mu, H. Gao, C. Li, S. Li, Y. Wang, Y. Zhang, C. Ma, H. Zhang and X. Liu, *Talanta*, 2021, **221**, 121606.
18. Q. Yi, J. He, X. Fu, J. Ying and L. Gong, J. Shen, and X. He, *Dye. Pigment.*, 2021, **196**, 109816.
19. A. Maiti, S. K. Manna, S. Halder, M. Mandal, A. Karak, D. Banik, K. Jana and A. K. Mahapatra, *Org. Biomol. Chem.*, 2022, **20**, 4949–4963.
20. Y. Z. Yang, M. Qing, X. Y. Luo, J. Xie and L. N. Zhang, *Spectrochim. Acta Part A Mol. Biomol. Spectrosc.*, 2022, **270**, 120795.
21. L. Liu, M. Xing, Y. Han, X. Zhang, P. Li, D. Cao, S. Zhao, L. Ma and Z. Liu, *Spectrochim. Acta Part A Mol. Biomol. Spectrosc.*, 2022, **264**, 120272.
22. N. Rao, Y. Le, D. Li, Y. Zhang, Q. Wang, L. Liu, and L. Yan, *Chem. Pap.*, 2022, **76**, 267–275.
23. D.-P. Li, L. Wei, X. Guo, X. Ran, T. Zhang, T. Zhang, H. Xiao and W. Shu, *RSC Adv.*, 2023, **13**, 35811–35815.
24. A. Maiti, D. Banik, S. Halder, S. K. Manna, A. Karak, K. Jana and A. K. Mahapatra, *Org. Biomol. Chem.*, 2023, **21**, 6046–6056.
25. C. O. Santos, S. T. A. Passos, J. E. P. Sorto, D. F. S. Machado, J. R. Correa, E. N. da Silva Júnior, M. O. Rodrigues and B. A. D. Neto, *Org. Biomol. Chem.*, 2023, **21**, 4606–4619.
